# Supplementary material for: Impact of depressive symptoms on worklife expectancy: a longitudinal study on Danish employees
Source: PubMed Central journal article supplement — Occup Environ Med. 2019 Oct 3;76(11):838–44. doi: 10.1136/oemed-2019-105961 (PMC6839798; doi:10.1136/oemed-2019-105961), 2019-10-03
Supplement: oemed-2019-105961supp001.pdf [file oemed-2019-105961supp001.pdf]

## Supplementary material – Results for employees with the ERP scheme

**Supplementary Table 1 - Characteristics of the N=4205 employees with the ERP scheme.**

|                                            | <b>Women<br/>N (%)</b> | <b>Men<br/>N (%)</b> |
|--------------------------------------------|------------------------|----------------------|
| Total N:                                   | 2397                   | 1808                 |
| Age group (years):                         |                        |                      |
| 18-29                                      | 56 (2.3%)              | 30 (1.7%)            |
| 30-39                                      | 210 (8.8%)             | 107 (5.9%)           |
| 40-49                                      | 651 (27.2%)            | 388 (21.5%)          |
| 50-59                                      | 1304 (54.4%)           | 1041 (57.6%)         |
| 60-64                                      | 176 (7.3%)             | 242 (13.4%)          |
| Highest educational level:                 |                        |                      |
| Basic school                               | 384 (16%)              | 275 (15.2%)          |
| High school                                | 72 (3%)                | 63 (3.5%)            |
| Vocational School                          | 865 (36.1%)            | 953 (52.7%)          |
| Short and medium higher education          | 870 (36.3%)            | 352 (19.5%)          |
| Bachelor and long higher education         | 197 (8.2%)             | 154 (8.5%)           |
| Not available                              | 9 (0.4%)               | 11 (0.6%)            |
| Sector:                                    |                        |                      |
| Manufacturing                              | 174 (7.3%)             | 303 (16.8%)          |
| Constructions                              | 17 (0.7%)              | 127 (7%)             |
| Graphic                                    | 12 (0.5%)              | 17 (0.9%)            |
| Transport and wholesale                    | 96 (4%)                | 205 (11.3%)          |
| Trade                                      | 44 (1.8%)              | 17 (0.9%)            |
| Service Trade                              | 86 (3.6%)              | 76 (4.2%)            |
| Agriculture                                | 5 (0.2%)               | 22 (1.2%)            |
| Social security and health                 | 935 (39%)              | 105 (5.8%)           |
| Education and research                     | 214 (8.9%)             | 137 (7.6%)           |
| Finance, public offices and administration | 212 (8.8%)             | 84 (4.6%)            |
| Private offices and administration         | 94 (3.9%)              | 88 (4.9%)            |
| Not available                              | 508 (21.2%)            | 627 (34.7%)          |
| Body Mass Index (BMI):                     |                        |                      |
| Obesity (BMI: > 29.9)                      | 310 (12.9%)            | 277 (15.3%)          |
| Overweight (BMI: between 25.0 and 29.9)    | 686 (28.6%)            | 831 (46.0%)          |
| Normal (BMI: between 18.5 and 24.9)        | 1312 (54.7%)           | 672 (37.1%)          |
| Underweight (BMI: < 18.5)                  | 43 (1.8%)              | 4 (0.2%)             |
| Not available                              | 46 (1.9%)              | 24 (1.3%)            |
| Smoking:                                   |                        |                      |
| Smoker                                     | 478 (19.9%)            | 382 (21.1%)          |
| Non smoker                                 | 1901 (79.3%)           | 1411 (78%)           |
| Not available                              | 18 (0.8%)              | 15 (0.8%)            |
| Depression by MDI score:                   |                        |                      |
| Depression (MDI $\geq$ 21)                 | 397 (16.6%)            | 194 (10.7%)          |
| No depression (MDI < 21)                   | 2000 (83.4%)           | 1614 (89.3%)         |

MDI: Major Depression Inventory. ERP: Early Retirement Pension.

**Supplementary Figure 1 - Working Life Expectancy of employees with ERP scheme by depressive symptom level (MDI  $\geq$  21), sex and age.**

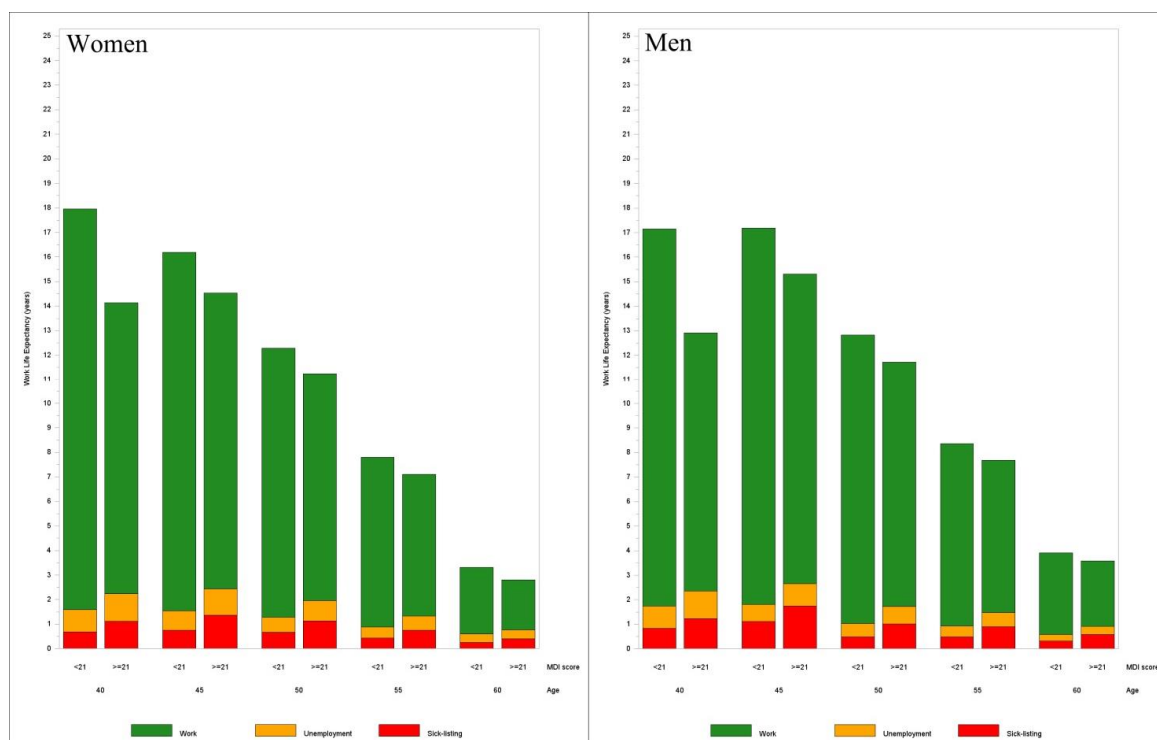

MDI: Major Depression Inventory. ERP: Early Retirement Pension.

**Supplementary Table 2 - Working Life Expectancy in years of employees with the ERP scheme, by depressive symptom level (MDI  $\geq$  21), sex and age. Percent difference (Diff.) in WLE between MDI scores by sex and age.**

| Sex   | Age       | MDI score     | Work (95% CL)    | Diff.         | Unemployment (95% CL) | Diff.         | Sick (95% CL) | Diff. |
|-------|-----------|---------------|------------------|---------------|-----------------------|---------------|---------------|-------|
| Woman | 40        | < 21          | 16.9 (15.9-18.0) |               | 0.9 (0.2-1.7)         | 22,2%         | 0.7 (0.2-1.2) | 57,1% |
|       |           | $\geq$ 21     | 12.2 (11.0-13.4) | -27,8%        | 1.1 (0.3-2.0)         |               | 1.1 (0.4-1.9) |       |
|       | 45        | < 21          | 15.3 (14.5-16.1) |               | 0.8 (0.3-1.3)         | 37,5%         | 0.8 (0.3-1.2) | 75%   |
|       |           | $\geq$ 21     | 12.5 (11.6-13.5) | -18,3%        | 1.1 (0.4-1.8)         |               | 1.4 (0.6-2.2) |       |
|       | 50        | < 21          | 11.7 (11.1-12.3) |               | 0.6 (0.3-1.0)         | 33,3%         | 0.7 (0.3-1.1) | 71,4% |
|       |           | $\geq$ 21     | 9.8 (9.0-10.5)   | -16,2%        | 0.8 (0.4-1.3)         |               | 1.2 (0.6-1.8) |       |
| 55    | < 21      | 7.6 (7.2-8.1) |                  | 0.5 (0.2-0.8) | 20%                   | 0.5 (0.2-0.7) | 60%           |       |
|       | $\geq$ 21 | 6.3 (5.8-6.8) | -17,1%           | 0.6 (0.2-1.0) |                       | 0.8 (0.4-1.2) |               |       |
| 60    | < 21      | 3.4 (3.1-3.7) |                  | 0.4 (0.1-0.7) | 0%                    | 0.3 (0.1-0.5) | 33,3%         |       |
|       | $\geq$ 21 | 2.5 (2.2-2.8) | -26,5%           | 0.4 (0.1-0.7) |                       | 0.4 (0.1-0.7) |               |       |
| Men   | 40        | < 21          | 15.7 (14.7-16.7) |               | 0.9 (-0.1-1.9)        | 22,2%         | 0.8 (0.8-0.8) | 50%   |
|       |           | $\geq$ 21     | 10.7 (9.6-11.7)  | -31,8%        | 1.1 (-0.1-2.3)        |               | 1.2 (0.5-1.9) |       |
|       | 45        | < 21          | 15.7 (15.0-16.5) |               | 0.7 (0.2-1.2)         | 28,6%         | 1.1 (0.5-1.8) | 63,6% |
|       |           | $\geq$ 21     | 12.8 (11.9-13.8) | -18,5%        | 0.9 (0.3-1.5)         |               | 1.8 (0.8-2.7) |       |
|       | 50        | < 21          | 12.2 (11.6-12.7) |               | 0.6 (0.1-1.0)         | 16,7%         | 0.5 (0.2-0.8) | 100%  |
|       |           | $\geq$ 21     |                  | -16,4%        |                       |               |               |       |

|    |      |                 |        |               |     |               |      |
|----|------|-----------------|--------|---------------|-----|---------------|------|
|    | ħ 21 | 10.2 (9.5-10.9) |        | 0.7 (0.2-1.3) |     | 1.0 (0.4-1.6) |      |
| 55 | < 21 | 7.8 (7.4-8.2)   | -17,9% | 0.5 (0.2-0.7) | 20% | 0.5 (0.2-0.8) | 80%  |
|    | ħ 21 | 6.4 (5.9-6.9)   |        | 0.6 (0.3-0.9) |     | 0.9 (0.4-1.4) |      |
| 60 | < 21 | 3.6 (3.4-3.9)   | -22,2% | 0.3 (0.1-0.4) | 0%  | 0.3 (0.1-0.6) | 100% |
|    | ħ 21 | 2.8 (2.6-3.1)   |        | 0.3 (0.2-0.5) |     | 0.6 (0.2-1.0) |      |

MDI: Major Depression Inventory. CL: Confidence Limits, Diff.: Percent difference in WLE between MDI scores by sex and age. ERP: Early Retirement Pension.

**Supplementary Table 3 - The estimates of the Cox proportional hazard model for employees with the ERP scheme.**

| Transition                              | MDI score | Women HR(95% CL)  | Men HR(95% CL)     |
|-----------------------------------------|-----------|-------------------|--------------------|
| Work to Sick                            | < 21      | 2.02 (1.32-3.08)* | 1.64 (0.81-3.32)   |
|                                         | ħ 21      | 1.00 (-)          | 1.00 (-)           |
| Work to Unemployment                    | < 21      | 1.92 (1.30-2.84)* | 1.11 (0.68-1.80)   |
|                                         | ħ 21      | 1.00 (-)          | 1.00 (-)           |
| Work to TO                              | < 21      | 1.33 (1.09-1.64)* | 1.18 (0.85-1.64)   |
|                                         | ħ 21      | 1.00 (-)          | 1.00 (-)           |
| Work/Sick/Unemployment/TO to Disability | < 21      | 2.62 (1.02-6.73)* | 4.69 (1.79-12.29)* |
|                                         | ħ 21      | 1.00 (-)          | 1.00 (-)           |
| Work/Sick/Unemployment/TO to ERP        | < 21      | 1.93 (1.35-2.78)* | 1.85 (1.10-3.09)*  |
|                                         | ħ 21      | 1.00 (-)          | 1.00 (-)           |
| Work/Sick/Unemployment/TO to PO         | < 21      | 1.12 (0.70-1.78)  | 0.89 (0.38-2.04)   |
|                                         | ħ 21      | 1.00 (-)          | 1.00 (-)           |
| Sick to Work                            | < 21      | 0.76 (0.54-1.07)  | 0.55 (0.32-0.94)*  |
|                                         | ħ 21      | 1.00 (-)          | 1.00 (-)           |
| Sick to Unemployment                    | < 21      | 1.34 (0.78-2.30)  | 1.32 (0.66-2.61)   |
|                                         | ħ 21      | 1.00 (-)          | 1.00 (-)           |
| Sick to TO                              | < 21      | 1.19 (0.71-1.98)  | 0.86 (0.35-2.11)   |
|                                         | ħ 21      | 1.00 (-)          | 1.00 (-)           |
| Unemployment to Work                    | < 21      | 1.18 (0.86-1.62)  | 0.68 (0.47-0.98)*  |
|                                         | ħ 21      | 1.00 (-)          | 1.00 (-)           |
| Unemployment to Sick                    | < 21      | 1.64 (1.03-2.60)* | 1.68 (0.77-3.64)   |
|                                         | ħ 21      | 1.00 (-)          | 1.00 (-)           |
| Unemployment to TO                      | < 21      | 0.73 (0.57-0.94)* | 1.20 (0.91-1.58)   |
|                                         | ħ 21      | 1.00 (-)          | 1.00 (-)           |
| TO to Work                              | < 21      | 0.93 (0.72-1.21)  | 1.09 (0.69-1.73)   |
|                                         | ħ 21      | 1.00 (-)          | 1.00 (-)           |
| TO to Sick                              | < 21      | 1.45 (0.75-2.81)  | 1.58 (0.52-4.76)   |
|                                         | ħ 21      | 1.00 (-)          | 1.00 (-)           |
| TO to Unemployment                      | < 21      | 1.03 (0.69-1.54)  | 1.23 (0.64-2.39)   |
|                                         | ħ 21      | 1.00 (-)          | 1.00 (-)           |

\*: 5% significant. MDI: Major Depression Inventory. HR: Hazard Ratio. CL: Confidence Limits. ERP: Early Retirement Scheme. TO: Temporary Out. PO: Permanently Out.
